# Supplementary material for: Circulating whole genome miRNA expression corresponds to progressive right ventricle enlargement and systolic dysfunction in adults with tetralogy of Fallot
Source: PubMed Central journal article supplement (PMC7657553; doi:10.1371/journal.pone.0241476), 2020-11-11
Supplement: pone.0241476.s001.pdf [file pone.0241476.s001.pdf]

## Supplemental Results

**Supplemental Table 1.** Comparison of TTE measures of right ventricular end diastolic area (RVEDA) (cm<sup>2</sup>), RV end systolic area (RVESA) (cm<sup>2</sup>), and RV fractional area change (RVFAC), with cardiac MRI measures of RV end diastolic volume (RVEDV) (ml), RV end systolic volume (RVESV) (ml), and RV ejection fraction (RVEF%).

|           | TTE                      |                          |       | Cardiac MRI |            |        |
|-----------|--------------------------|--------------------------|-------|-------------|------------|--------|
| TTE Group | RVEDA (cm <sup>2</sup> ) | RVESA (cm <sup>2</sup> ) | RVFAC | RVEDV (ml)  | RVESV (ml) | RVEF % |
| Mild/Mod  | 43                       | 27                       | 37    | 211         | 130        | 39     |
| Mild/Mod  | 36                       | 17                       | 52    | 237         | 145        | 39     |
| Mild/Mod  | 33                       | 20                       | 41    | 240         | 146        | 39     |
| Severe    | 52                       | 37                       | 28    | 285         | 180        | 37     |

**Supplemental Table 2.** Top 20 Upregulated miRNA

| miRNA             | Corrected P – ANOVA between all groups | FC (Mild/Mod] vs [Normal]) | FC (Severe] vs [Normal]) | Sequence             |
|-------------------|----------------------------------------|----------------------------|--------------------------|----------------------|
| hsa-miR-431-3p    | 0.0115310                              | 34.2                       | 78.5                     | AGAAGCCCTGCAAGACG    |
| hsa-miR-196a-3p   | 0.0115310                              | 29.2                       | 72.5                     | CTCAGGCAGTTTCTT      |
| hsa-miR-767-3p    | 0.0115310                              | 11.3                       | 66.6                     | AGAAACCATGGGGTATGA   |
| hsa-miR-433-3p    | 0.0115310                              | 11.9                       | 39.1                     | ACACCGAGGAGCCC       |
| hsa-miR-676-3p    | 0.0314191                              | 12.3                       | 36.9                     | AACTCAACAACCTTAGGA   |
| hsa-miR-632       | 0.0263168                              | 13.7                       | 32.2                     | TCCCACAGGAAGCAGAC    |
| hsa-miR-604       | 0.0160920                              | 19.5                       | 31.6                     | GTCCTGAATTCCGCAGC    |
| hsa-miR-219a-2-3p | 0.0295370                              | 10.8                       | 27.3                     | ACAGATGTCCAGCCAC     |
| hsa-miR-520a-5p   | 0.0202035                              | 9.9                        | 25.2                     | AGAAAGTACTTCCCTCTGG  |
| hsa-miR-635       | 0.0147121                              | 12.4                       | 24.3                     | GGACATTGTTTCAGTGCCCA |
| hsa-miR-541-3p    | 0.0267067                              | 13.5                       | 23.8                     | AGTCCAGATTCTGTGCC    |
| hsa-miR-371b-3p   | 0.0115310                              | 5.4                        | 21.6                     | GCACTCAAACGTGGG      |
| hsa-miR-92b-5p    | 0.0181049                              | 7.2                        | 20.8                     | CACTGCACCGCGTC       |
| hsa-miR-492       | 0.0185653                              | 7.7                        | 20.7                     | AAGAATCTTGTCCCGCAGG  |
| hsa-miR-381-5p    | 0.0160920                              | 7.3                        | 19.2                     | ATATACAAAGGGCAACCTC  |
| hsa-miR-205-5p    | 0.0477631                              | 14.5                       | 16.2                     | CAGACTCCGGTGAAT      |
| hsa-miR-485-5p    | 0.0189460                              | 4.9                        | 13.4                     | GAATTCATCACGGCCAGC   |
| hsa-miR-138-5p    | 0.0489596                              | 9.5                        | 12.9                     | CGGCCTGATTCACA       |
| hsa-miR-143-5p    | 0.0317364                              | 5.1                        | 9.8                      | ACCAGAGATGCAGCACT    |
| hsa-miR-28-3p     | 0.0003685                              | 4.6                        | 6.1                      | TCCAGGAGCTCACA       |

**Supplemental Table 3. Top 20 Downregulated miRNA**

| <b>miRNA</b>     | <b>Corrected P –<br/>ANOVA<br/>between all<br/>groups</b> | <b>FC ([Mild/Mod] vs<br/>[Normal])</b> | <b>FC ([Severe] vs<br/>[Normal])</b> | <b>Sequence</b>        |
|------------------|-----------------------------------------------------------|----------------------------------------|--------------------------------------|------------------------|
| hsa-miR-466      | 0.0116555                                                 | -151.0                                 | -1671.6                              | ATGTGTGTTGCGTGTATG     |
| hsa-miR-449b-3p  | 0.0115669                                                 | -127.2                                 | -1318.3                              | AGTGGCAGGGTAGTTG       |
| hsa-miR-34b-3p   | 0.0115310                                                 | -154.0                                 | -1045.5                              | ATGGCAGTGGAGTTAGT      |
| hsa-miR-451b     | 0.0115310                                                 | -105.8                                 | -904.7                               | AATGGTAATGGTTCTCTTGC   |
| hsa-miR-449c-3p  | 0.0140814                                                 | -82.8                                  | -855.3                               | ACAGAGAGGAGTGCAAC      |
| hsa-miR-764      | 0.0115310                                                 | -118.6                                 | -810.0                               | AGGAGGACAAGTGAGC       |
| hsa-miR-494-5p   | 0.0145486                                                 | -76.5                                  | -533.8                               | AGAGAAGACAACACGGA      |
| hsa-miR-609      | 0.0136966                                                 | -69.8                                  | -458.0                               | AGAGATGAGAGAAACACCC    |
| hsa-miR-647      | 0.0115310                                                 | -85.9                                  | -438.9                               | GAAGGAAGTGAGTGCAG      |
| hsa-miR-548aa    | 0.0115310                                                 | -73.8                                  | -389.6                               | TGGTGCAAAAGTAATTGTG    |
| hsa-miR-33a-3p   | 0.0115310                                                 | -71.9                                  | -384.5                               | GTGATGCACTGTGGAA       |
| hsa-miR-134-3p   | 0.0115310                                                 | -67.4                                  | -348.4                               | TTGGTGACTAGGTGGC       |
| hsa-miR-568      | 0.0115310                                                 | -66.7                                  | -337.6                               | GTGTGTATACATTTATACAT   |
| hsa-miR-548v     | 0.0115310                                                 | -63.6                                  | -318.4                               | TGGTGCAAAAGTAACTGT     |
| hsa-miR-876-5p   | 0.0115310                                                 | -62.4                                  | -317.3                               | TGGTGATTCACAAAGAAATCCA |
| hsa-miR-130a-5p  | 0.0137388                                                 | -44.3                                  | -247.7                               | GCAGACAGTAGCACAATG     |
| hsa-miR-511-3p   | 0.0139931                                                 | -38.0                                  | -203.2                               | TCTGTCTTTTGCTACACA     |
| hsa-miR-885-5p   | 0.0489596                                                 | -64.1                                  | -174.2                               | AGAGGCAGGGTAGTGTA      |
| hsa-miR-548au-3p | 0.0115669                                                 | -38.1                                  | -174.2                               | CTGGTGCAAAAGTAACT      |
| hsa-miR-943      | 0.0115669                                                 | -38.0                                  | -170.1                               | CTGGAGGACGGCAA         |

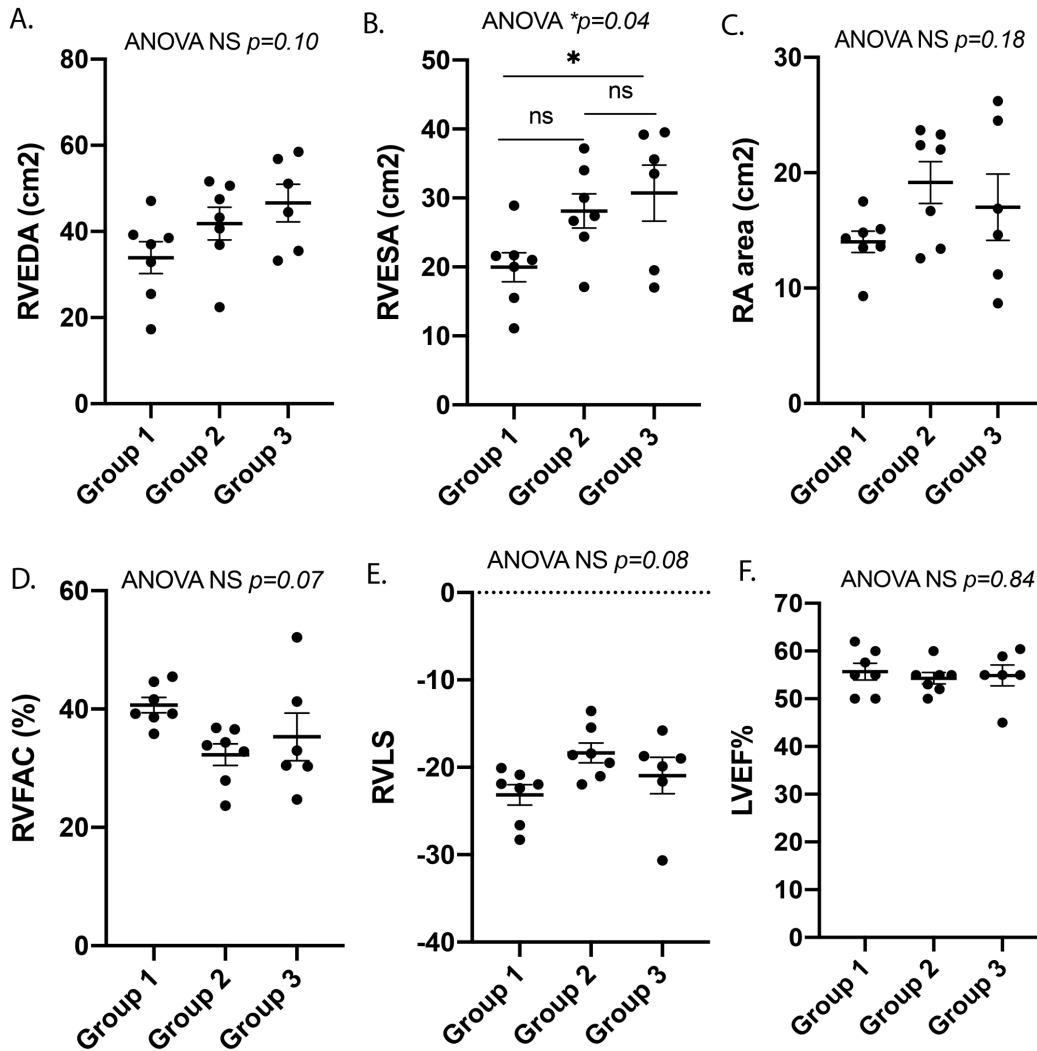

**Supplemental Figure 1. Echocardiographic data based on hierarchical clustering groups show that groups correspond to RVESA.** Echocardiographic characteristics based on unbiased hierarchical clustering of miRNA into 3 groups. (A) RV end diastolic area (cm<sup>2</sup>) (RVEDA) trended toward increasing with Group 2 and 3, (B) RV end systolic area (cm<sup>2</sup>) (RVESA) increased with Group 2 and 3, (C) right atrial area (cm<sup>2</sup>) (RA) did not change between the groups, (D) RV fractional area change (RVFAC) trended toward decreasing with Group 2 and 3, (E) RV free wall Lagrangian longitudinal strain (RVLS) trended toward increasing with Group 2 and 3, and (F) LV ejection fraction (LVEF%) did not change between the groups. RV – right ventricle. Data is presented as mean±SEM.

**Supplemental Table 4. Top 25 Dysregulated pathways from upregulated miRNA**

| <b>KEGG pathway</b>                                | <b>p-value</b> | <b>#genes</b> | <b>#miRNAs</b> |
|----------------------------------------------------|----------------|---------------|----------------|
| <b>Fatty acid biosynthesis</b>                     | 4.793E-09      | 1             | 1              |
| <b>Adherens junction</b>                           | 8.497E-08      | 30            | 13             |
| <b>Cell cycle</b>                                  | 1.143E-07      | 51            | 13             |
| <b>Viral carcinogenesis</b>                        | 1.617E-07      | 59            | 17             |
| <b>ECM-receptor interaction</b>                    | 1.087E-06      | 24            | 15             |
| <b>Glioma</b>                                      | 2.079E-06      | 26            | 12             |
| <b>Hepatitis B</b>                                 | 6.485E-06      | 45            | 13             |
| <b>Proteoglycans in cancer</b>                     | 6.485E-06      | 60            | 15             |
| <b>Hippo signaling pathway</b>                     | 1.217E-05      | 44            | 16             |
| <b>Pancreatic cancer</b>                           | 1.445E-05      | 27            | 11             |
| <b>Pathways in cancer</b>                          | 2.787E-05      | 100           | 16             |
| <b>Bladder cancer</b>                              | 3.052E-05      | 19            | 14             |
| <b>Protein processing in endoplasmic reticulum</b> | 4.786E-05      | 53            | 13             |
| <b>Chronic myeloid leukemia</b>                    | 5.405E-05      | 29            | 11             |
| <b>Transcriptional misregulation in cancer</b>     | 9.525E-05      | 45            | 13             |
| <b>Oocyte meiosis</b>                              | 1.195E-04      | 36            | 13             |
| <b>HTLV-I infection</b>                            | 1.195E-04      | 74            | 17             |
| <b>p53 signaling pathway</b>                       | 3.962E-04      | 26            | 12             |
| <b>Bacterial invasion of epithelial cells</b>      | 7.413E-04      | 26            | 13             |
| <b>Shigellosis</b>                                 | 7.681E-04      | 23            | 11             |
| <b>HIF-1 signaling pathway</b>                     | 7.768E-04      | 36            | 11             |
| <b>FoxO signaling pathway</b>                      | 1.132E-03      | 42            | 13             |
| <b>Prostate cancer</b>                             | 1.856E-03      | 31            | 12             |
| <b>TGF-beta signaling pathway</b>                  | 3.479E-03      | 22            | 11             |
| <b>Epstein-Barr virus infection</b>                | 3.479E-03      | 57            | 16             |

**Supplemental Table 5.** Top 25 Dysregulated pathways from downregulated miRNA

| <b>KEGG pathway</b>                         | <b>p-value</b> | <b>#genes</b> | <b>#miRNAs</b> |
|---------------------------------------------|----------------|---------------|----------------|
| Cell cycle                                  | 4.008E-11      | 83            | 34             |
| Lysine degradation                          | 5.202E-10      | 31            | 29             |
| Hippo signaling pathway                     | 5.380E-09      | 79            | 34             |
| Adherens junction                           | 1.850E-08      | 49            | 33             |
| Prion diseases                              | 9.956E-08      | 16            | 21             |
| Proteoglycans in cancer                     | 2.372E-07      | 100           | 36             |
| TGF-beta signaling pathway                  | 2.757E-07      | 47            | 31             |
| Chronic myeloid leukemia                    | 1.468E-06      | 49            | 32             |
| Spliceosome                                 | 6.015E-06      | 77            | 34             |
| p53 signaling pathway                       | 6.049E-06      | 47            | 28             |
| Protein processing in endoplasmic reticulum | 1.359E-05      | 94            | 34             |
| Shigellosis                                 | 2.990E-05      | 41            | 28             |
| Viral carcinogenesis                        | 4.580E-05      | 104           | 37             |
| Fatty acid biosynthesis                     | 4.763E-05      | 6             | 9              |
| ECM-receptor interaction                    | 6.045E-05      | 36            | 23             |
| Neurotrophin signaling pathway              | 6.575E-05      | 69            | 33             |
| Bacterial invasion of epithelial cells      | 6.575E-05      | 46            | 28             |
| RNA transport                               | 8.471E-05      | 91            | 37             |
| FoxO signaling pathway                      | 1.179E-04      | 74            | 32             |
| Pancreatic cancer                           | 1.603E-04      | 40            | 29             |
| Hepatitis B                                 | 2.465E-04      | 74            | 35             |
| Glioma                                      | 2.465E-04      | 37            | 30             |
| Oocyte meiosis                              | 3.009E-04      | 59            | 33             |
| Prostate cancer                             | 4.812E-04      | 53            | 31             |
| Long-term depression                        | 5.929E-04      | 29            | 25             |

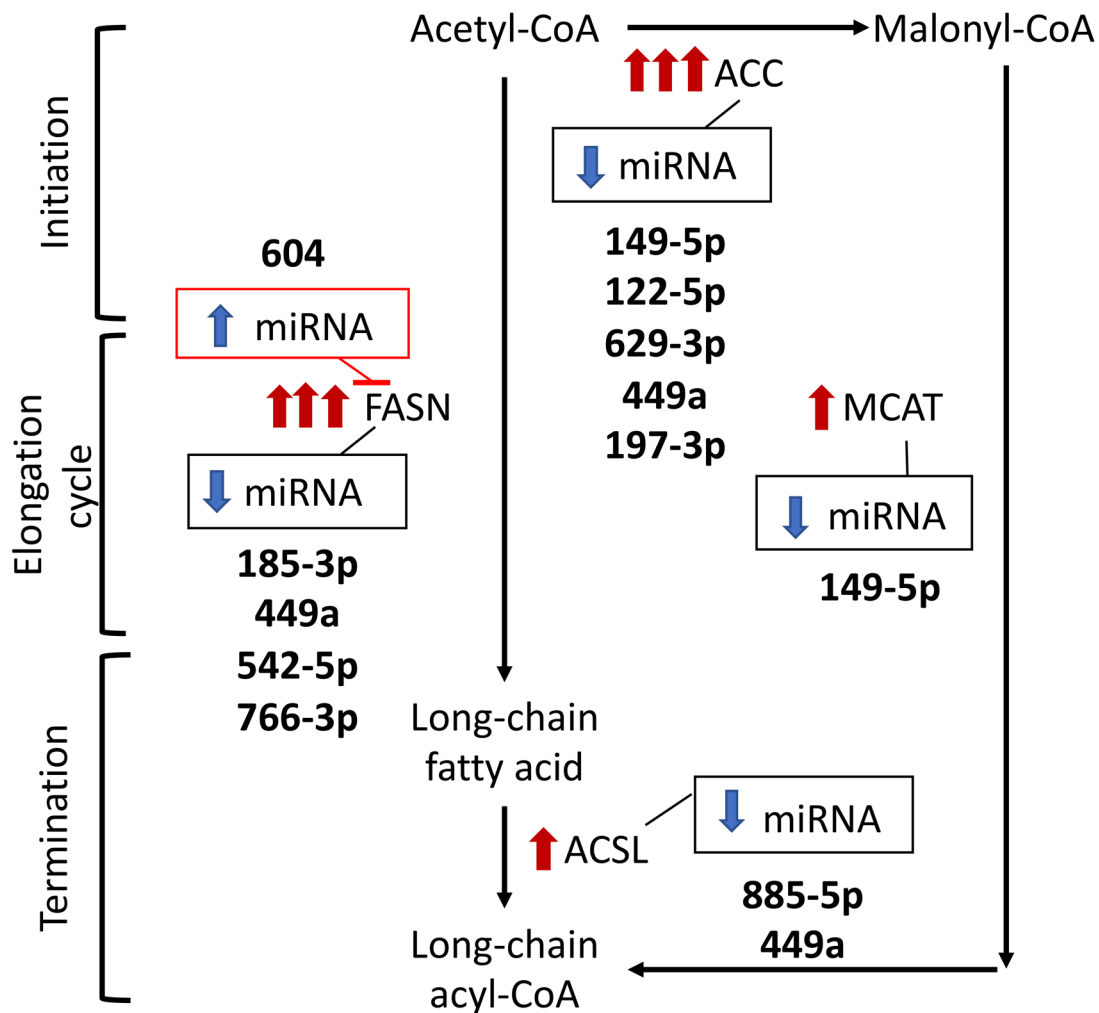

**Supplemental Figure 2. Schematic of fatty acid metabolism pathway of dysregulated miRNA show net effect to enhance fatty acid metabolism.** Up and downregulated miRNA target specific genes within fatty acid metabolism pathway, with net effect appearing to increase FASN, ACC, MCAT, and ACSL expression. FASN – fatty acid synthase; ACC – Acetyl-CoA Carboxylase A; MCAT – Malonyl CoA Acyl Carrier Protein Transacylase; ACSL – Acyl-CoA Synthetase Long Chain.

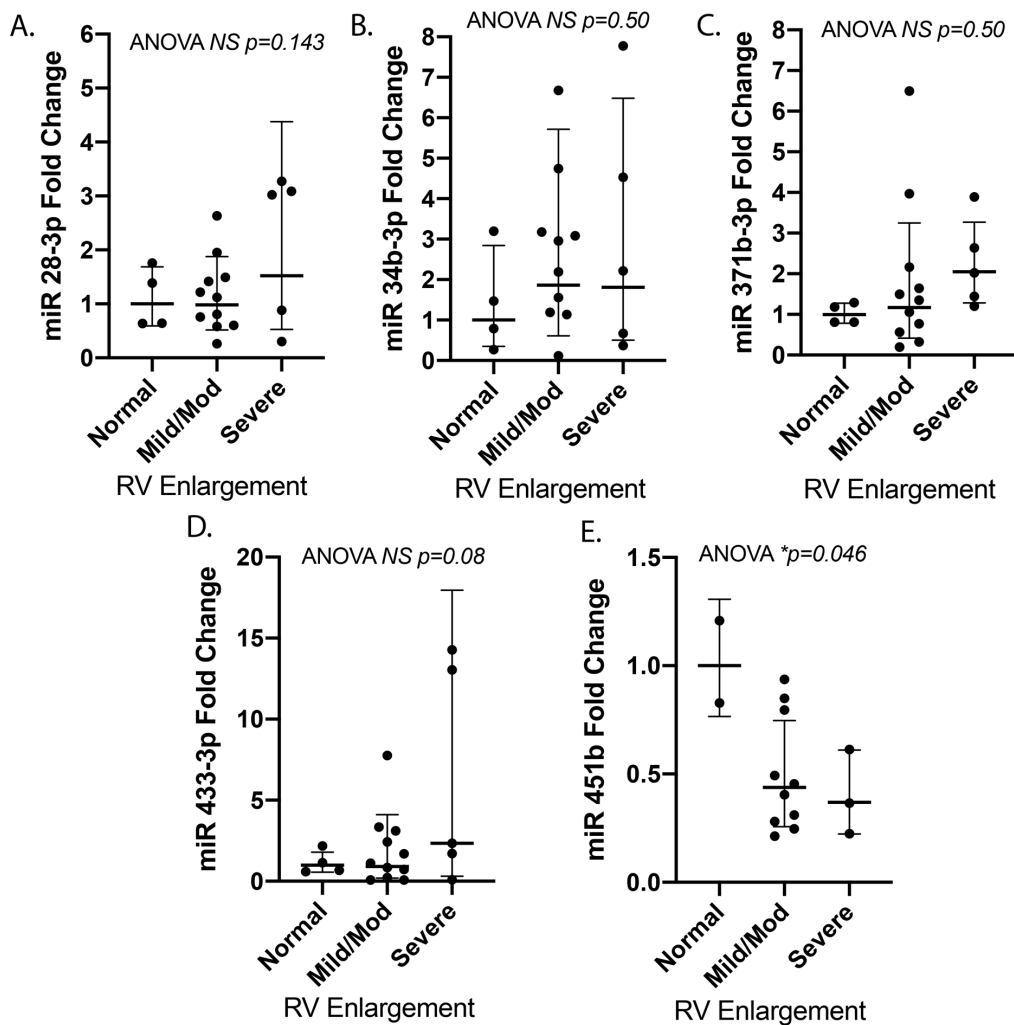

**Supplemental Figure 3. qPCR validation of select miRNA show strong concordance with microarray data.** (A) miR-28-3p, (B) miR 34-3p, (C) miR 371b-3p and (D) miR 433-3p trended toward increasing expression with increasing RV enlargement while, (E) miR 451b decreased with increasing RV enlargement. miR – microRNA. Data is presented as geometric mean +/- SD.

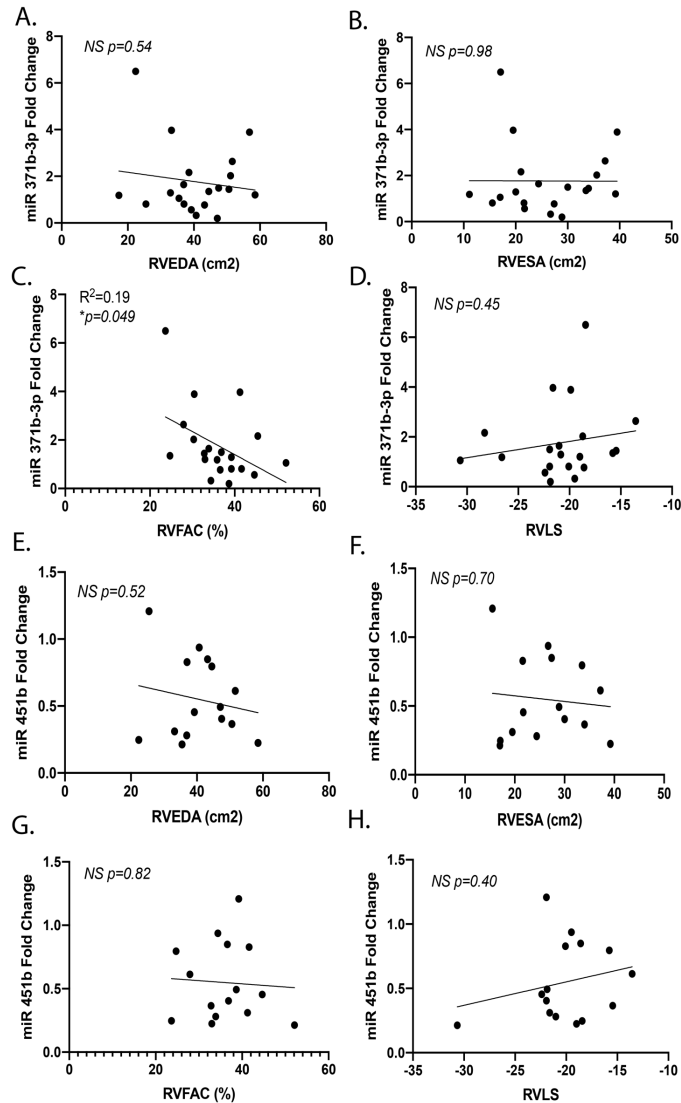

**Supplemental Figure 4. miRNA 371b-3p has linear relationship to RVFAC but not RV size whereas miRNA 451b has minimal relationship.** Increasing expression of miR 371b-3p does not appear to have any relationship to (A) RVEDA and (B) RVESA. (C) Increasing miR 371b-3p expression is associated with decreasing RVFAC, (D) but is not associated with RVLS. (E) Expression of miR 451b did not have significant linear relationships to RVEDA, (F) RVESA, (G) RVFAC or (H) RVLS. Data is shown as dot plot with simple linear regression ( $*p<0.05$ ,  $**p<0.01$ ). RV – right ventricle, RVEDA – RV end diastolic area, RVESA – RV end systolic area, RVFAC – RV fractional area change, RVLS – RV longitudinal strain.
